# Supplementary material for: MRI-derived atrophy in multiple system atrophy aligns with mitochondrial and glial gene expression patterns
Source: Research Square preprint supplement (doi:10.21203/rs.3.rs-7095251/v1), 2025-07-18
Supplement: Supplementary file 1 [file 26d0af83f19b8469fa14c4ce.docx]

**Appendix**

1. **Details about the neurotransmitter mapping analysis**

We used regional the density maps of 18 receptors, transporters, and receptor binding sites associated with dopamine [D1,1 D2,2,3 dopamine transporter (DAT) 4], serotonin [5-HT1A,5 5-HT1B,5,6 5-HT2A,7 5-HT4, 5-HT6,8 serotonin transporter (5-HTT)7], noradrenaline [noradrenaline transporter (NET)],9 acetylcholine [α4β2,10 M1,11 vesicular acetylcholine transporter (VAChT) 12–14], GABA GABAA/BZ),7 glutamate (mGluR5),12,15,16 histamine (H3),17 endocannabinoids (CB1),18 and opioids (μ).19 They were obtained from the PET images of 1238 healthy individuals (see Table below and Supplementary Table 3 in Hansen et al.12 for details).

| **Neurotransmitter** | **Target** | **Tracer** | **Participants** | **Age (years)** | **Measure** | **Reference region** | **References** |
| --- | --- | --- | --- | --- | --- | --- | --- |
| Serotonin | 5HT1a | [*carbonyl-*11C]WAY-100635 | 35 | 26,3±5,2 | BPnd | cerebellum | [savli2012neuroimage](https://www.sciencedirect.com/science/article/pii/S1053811912007021?via%3Dihub) |
| 5HT1b | [11C]P943 | 65 | 33,7±9,7 | BPnd | cerebellum | [gallezot2010jcerebbloodflowmetab](https://journals.sagepub.com/doi/full/10.1038/jcbfm.2009.195) |
| 5HT1b | [11C]P943 | 23 | 28,7±7,0 | BPnd | cerebellum | [savli2012neuroimage](https://www.sciencedirect.com/science/article/pii/S1053811912007021?via%3Dihub) |
| 5HT2a | [11C]CIMBI-36 | 29 | 22,6±2,7 | Bmax | cerebellum | [beliveau2017jneurosci](https://www.jneurosci.org/content/37/1/120) |
| 5HT4 | [11C]SB207145 | 59 | 25,9±5,3 | Bmax | cerebellum | [beliveau2017jneurosci](https://www.jneurosci.org/content/37/1/120) |
| 5HT6 | [11C]GSK215083 | 30 | 36,6±9,04 | BPnd | cerebellum | [radhakrishnan2018jnuclmed](https://www.ncbi.nlm.nih.gov/pmc/articles/PMC6126437/) |
| 5HTT | [11C]DASB | 100 | 25,1±5,8 | Bmax | cerebellum | [beliveau2017jneurosci](https://www.jneurosci.org/content/37/1/120) |
| Acetylcholine | α4β2 | [18F]FLUBATINE | 30 | 33,5±0,7 | Vt | NA | [hillmer2016neuroimage](https://www.sciencedirect.com/science/article/pii/S1053811916303330) |
| M1 | [11C]LSN3172176 | 24 | 40,4±11,7 | BPnd | cerebellum | [naganawa2020jnuclmed](https://jnm.snmjournals.org/content/early/2020/08/27/jnumed.120.246967) |
| VAChT | [18F]FEOBV | 3 | 66,6±0,9 | SUVR | white_matter | PI: Taylor W. Schmitz & R. Nathan Spreng (with Prevent AD) |
| VAChT | [18F]FEOBV | 4 | 37±10,2 | SUVR | white_matter | PI: Lauri Tuominen & Synthia Guimond |
| VAChT | [18F]FEOBV | 5 | 68,3±3,1 | SUVR | white_matter | [bedard2019sleepmed](https://www.sciencedirect.com/science/article/pii/S138994571830618X?via%3Dihub) |
| VAChT | [18F]FEOBV | 18 | 66,8±6,8 | SUVR | white_matter | [aghourian2017molpsychiatry](https://www.nature.com/articles/mp2017183) |
| Dopamine | D1 | [11C]SCH23390 | 13 | 33,0±13,0 | BPnd | cerebellum | [kaller2017eurjnuclmedmolimaging](https://link.springer.com/article/10.1007%2Fs00259-017-3645-0) |
| D2 | [11C]FLB457 | 37 | 48,4±16,9 | BPnd | cerebellum | [smith2017jcerebbloodflowmetab](https://journals.sagepub.com/doi/10.1177/0271678X17737693?url_ver=Z39.88-2003&rfr_id=ori:rid:crossref.org&rfr_dat=cr_pub%20%200pubmed) |
| D2 | [11C]FLB457 | 55 | 32,4±9,7 | BPnd | cerebellum | [sandiego2015jcerebbloodflowmetab](https://journals.sagepub.com/doi/10.1038/jcbfm.2014.237?url_ver=Z39.88-2003&rfr_id=ori:rid:crossref.org&rfr_dat=cr_pub%20%200pubmed) |
| DAT | [123I]FP-CIT | 174 | 61.0±11.0 | SUVR | occipital_cortex | [dukart2018scirep](https://www.nature.com/articles/s41598-018-22444-0) |
| GABA | GABAa | [11C]FLUMAZENIL | 16 | 26,6±8.0 | Bmax | NA | [norgaard2021neuroimage](https://www.sciencedirect.com/science/article/pii/S1053811921001555) |
| Histamine | H3 | [11C]GSK189254 | 8 | 31.7±9.0 | Vt | NA | [gallezot2017jcerebbloodflowmetab](https://journals.sagepub.com/doi/10.1177/0271678X16650697?url_ver=Z39.88-2003&rfr_id=ori:rid:crossref.org&rfr_dat=cr_pub%20%200pubmed) |
| Cannabinoids | CB1 | [11C]OMAR | 77 | 30,0±8,9 | Vt | NA | [normandin2015jcerebbloodflowmetab](https://journals.sagepub.com/doi/10.1038/jcbfm.2015.46?url_ver=Z39.88-2003&rfr_id=ori:rid:crossref.org&rfr_dat=cr_pub%20%200pubmed) |
| Noradrenaline | NET | [11C]MRB | 77 | 33,4±9,2 | BPnd | occipital_cortex | [ding2010synapse](https://onlinelibrary.wiley.com/doi/abs/10.1002/syn.20696) |
| Glutamate | mGluR5 | [11C]ABP688 | 22 | 67,9±9,6 | BPnd | cerebellar_cortex | PI: Pedro Rosa-Neto |
| mGluR5 | [11C]ABP688 | 28 | 33,1±11,2 | BPnd | cerebellar_cortex | [dubois2016eurjnuclmedmolimaging](https://link.springer.com/article/10.1007%2Fs00259-015-3167-6) |
| mGluR5 | [11C]ABP688 | 73 | 19,9±3,0 | BPnd | cerebellar_cortex | [smart2019eurjnuclmedmolimaging](https://link.springer.com/article/10.1007%2Fs00259-018-4252-4) |
| NMDAR | [18F]GE-179 | 29 | 40,9±12,7 | Vt | NA | [galovic2021preprint](https://www.medrxiv.org/content/10.1101/2021.12.04.21267226v1) |
| μ | [11C]CARFENTANIL | 204 | 32,3±10,8 | BPnd | occipital_cortex | [kantonen2020neuroimage](https://www.sciencedirect.com/science/article/pii/S1053811920304080) |

References:

1. Kaller, S. *et al.* Test–retest measurements of dopamine D1-type receptors using simultaneous PET/MRI imaging. *Eur. J. Nucl. Med. Mol. Imaging* **44**, 1025–1032 (2017).

2. Smith, C. T. *et al.* Partial-volume correction increases estimated dopamine D2-like receptor binding potential and reduces adult age differences. *J Cereb Blood Flow Metab* **39**, 822–833 (2019).

3. Sandiego, C. M. *et al.* Reference region modeling approaches for amphetamine challenge studies with [11C]FLB 457 and PET. *J Cereb Blood Flow Metab* **35**, 623–629 (2015).

4. Dukart, J. *et al.* Cerebral blood flow predicts differential neurotransmitter activity. *Sci Rep* **8**, 4074 (2018).

5. Savli, M. *et al.* Normative database of the serotonergic system in healthy subjects using multi-tracer PET. *Neuroimage* **63**, 447–459 (2012).

6. Gallezot, J.-D. *et al.* Kinetic modeling of the serotonin 5-HT1B receptor radioligand [11C]P943 in humans. *Journal of Cerebral Blood Flow and Metabolism: Official Journal of the International Society of Cerebral Blood Flow and Metabolism* **30**, 196 (2009).

7. Beliveau, V. *et al.* A High-Resolution In Vivo Atlas of the Human Brain’s Serotonin System. *J Neurosci* **37**, 120–128 (2017).

8. Radhakrishnan, R. *et al.* Age-Related Change in 5-HT6 Receptor Availability in Healthy Male Volunteers Measured with 11C-GSK215083 PET. *J Nucl Med* **59**, 1445–1450 (2018).

9. Ding, Y.-S. *et al.* PET imaging of the effects of age and cocaine on the norepinephrine transporter in the human brain using (S,S)-[(11)C]O-methylreboxetine and HRRT. *Synapse* **64**, 30–38 (2010).

10. Hillmer, A. T. *et al.* Imaging of cerebral α4β2* nicotinic acetylcholine receptors with (-)-[(18)F]Flubatine PET: Implementation of bolus plus constant infusion and sensitivity to acetylcholine in human brain. *Neuroimage* **141**, 71–80 (2016).

11. Naganawa, M. *et al.* First-in-Human Assessment of 11C-LSN3172176, an M1 Muscarinic Acetylcholine Receptor PET Radiotracer. *Journal of Nuclear Medicine* **62**, 553 (2021).

12. Hansen, J. Y. *et al.* Mapping neurotransmitter systems to the structural and functional organization of the human neocortex. *Nat. Neurosci.* **25**, 1569–1581 (2022).

13. Aghourian, M. *et al.* Quantification of brain cholinergic denervation in Alzheimer’s disease using PET imaging with [18F]-FEOBV. *Mol Psychiatry* **22**, 1531–1538 (2017).

14. Bedard, M.-A. *et al.* Brain cholinergic alterations in idiopathic REM sleep behaviour disorder: a PET imaging study with 18F-FEOBV. *Sleep Med* **58**, 35–41 (2019).

15. DuBois, J. M. *et al.* Characterization of age/sex and the regional distribution of mGluR5 availability in the healthy human brain measured by high-resolution [(11)C]ABP688 PET. *Eur J Nucl Med Mol Imaging* **43**, 152–162 (2016).

16. Smart, K. *et al.* Sex differences in [11C]ABP688 binding: a positron emission tomography study of mGlu5 receptors. *Eur J Nucl Med Mol Imaging* **46**, 1179–1183 (2019).

17. Gallezot, J.-D. *et al.* Determination of receptor occupancy in the presence of mass dose: [11C]GSK189254 PET imaging of histamine H3 receptor occupancy by PF-03654746. *Journal of Cerebral Blood Flow & Metabolism* **37**, 1095 (2016).

18. Normandin, M. D. *et al.* Imaging the cannabinoid CB1 receptor in humans with [11C]OMAR: assessment of kinetic analysis methods, test-retest reproducibility, and gender differences. *J Cereb Blood Flow Metab* **35**, 1313–1322 (2015).

19. Kantonen, T. *et al.* Interindividual variability and lateralization of μ-opioid receptors in the human brain. *NeuroImage* **217**, 116922 (2020).

1. **Contributors involved in the Blood Brain Barrier in Parkinson Plus Syndromes - BBBIPPS study**:

Steering committee: Pr. Y. Agid; Dr G. Bensimon; Pr. A. Brice; Pr. JJ Hauw; Pr. M. Vérin; Dr F. Viallet

Genetic data: Pr. A. Brice; Pr. W. Camu; Dr A. Durr; Dr JS Hulot; Dr I. Leber; Pr. André Delacourte; Pr. Charles Duyckaerts; Pr. JJ Hauw; Dr D. Seilhean

Functional data: Dr F. Durif; Pr. J. Fermanian; Dr C. Payan; Dr F. Viallet.

Neuroimaging: Pr. E. Broussolle; Pr. D. Dormont; Dr Y. Roland; Dr A. Tourbah; Pr. M. Vérin.
